# Supplementary material
Source: HighWire-hosted journal article supplement (https://gut.bmj.com/content/70/4/806)
Supplement: inline-supplementary-material-1 [file inline-supplementary-material-1.pdf]

## **Liou et al. Alteration of taste and smell in COVID-19 –A systematic review and meta-analysis**

**This supplement contains the following items:**

### **Methods**

#### **Supplementary Table 1. Additional characteristics of eligible studies**

#### **Supplementary Figures**

Figure S1. Forrest plots of the proportion of taste alteration in COVID-19 patients

Figure S2. Forrest plots of the proportion of smell alteration in COVID-19 patients

Figure S3. Forrest plots of the proportion of taste or smell alteration in COVID-19 patients

Figure S4. Forrest plots of the proportion of taste alteration in COVID-19 patients in East Asia versus non-East Asia

Figure S5. Forrest plot of the association of taste or smell alteration and COVID-19

Figure S6. Forrest plot of (A) sensitivity, (B) specificity, (C) Positive prediction value, (D) Negative prediction value, and (E) Accuracy of taste or smell alteration in the prediction of COVID-19

## Methods

Studies that reported the frequency of alteration in taste (dysgeusia, hypogeusia, ageusia) or smell (dysosmia, hyposmia, anosmia) in patients with laboratory confirmed COVID-19 cases and/or uninfected controls were eligible. Case reports and studies which only included patients with taste or smell alteration were excluded. Review articles or comments on other original studies were also excluded. The references of these articles were also searched for eligibility. The proportion of these symptoms in cases and/or controls and their 95% confidence interval (95% CI) and odds ratio (OR) were analyzed by random effect model using the Comprehensive Meta-analysis software.

**Supplementary Table 1. Additional characteristics of eligible studies**

| Ref. | Author               | Assessment of taste or smell alteration                                                                                                            | Diagnosis of COVID-19       |
|------|----------------------|----------------------------------------------------------------------------------------------------------------------------------------------------|-----------------------------|
| 1    | Lechien <sup>1</sup> | National Health and Nutrition Examination Survey, and the short version of the Questionnaire of Olfactory Disorders-Negative Statements (sQOD-NS). | RT-PCR                      |
| 2    | Roland               | UCSF COVID-19 Symptom Survey                                                                                                                       | Self-reported positive test |
| 3    | Yan-1                | 27-question survey                                                                                                                                 | RT-PCR                      |
| 4    | Beltran-Corbellini   | self-reported symptoms                                                                                                                             | RT-PCR                      |
| 5    | Mao                  | self-reported symptoms                                                                                                                             | RT-PCR                      |
| 6    | Giacomelli           | self-reported symptoms                                                                                                                             | RT-PCR                      |
| 7    | Lee                  | telephone interview                                                                                                                                | RT-PCR                      |
| 8    | Aggarwal             | interview                                                                                                                                          | RT-PCR                      |
| 9    | Moein                | University of Pennsylvania Smell Identification Test (UPSIT) & symptoms                                                                            | RT-PCR                      |
| 10   | Luers                | Total Nasal Symptom Score (TNSS)                                                                                                                   | RT-PCR                      |
| 11   | Paderno              | questionnaire                                                                                                                                      | RT-PCR                      |
| 12   | Vaira                | chemosensitive test                                                                                                                                | RT-PCR                      |
| 13   | Yan-2                | self-reported symptoms                                                                                                                             | RT-PCR                      |
| 14   | De Maria             | self-reported symptoms                                                                                                                             | RT-PCR                      |
| 15   | Merza                | self-reported symptoms                                                                                                                             | RT-PCR                      |
| 16   | Spinato              | telephone interview                                                                                                                                | RT-PCR                      |
| 17   | Clemency             | interview                                                                                                                                          | RT-PCR                      |
| 18   | Menni                | app-based symptom tracker                                                                                                                          | RT-PCR                      |

Ref: reference; COVID-19: coronavirus infectious disease 2019; RT-PCR: reverse transcriptase polymerase chain reaction.

## Supplementary Figures

**Figure S1. Forrest plots of the proportion of taste alteration in COVID-19 patients**

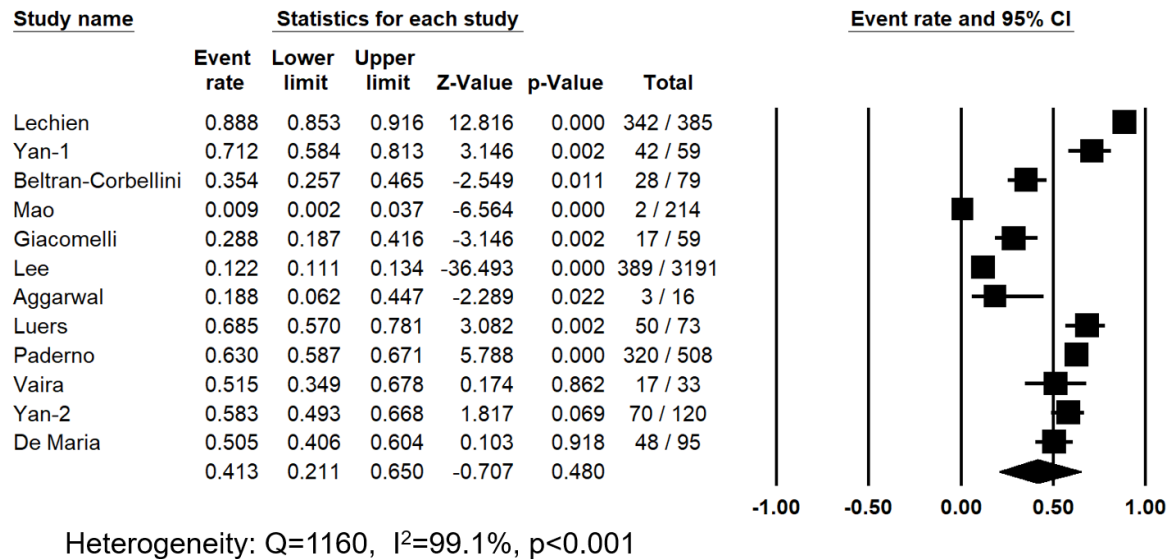

**Figure S2. Forrest plots of the proportion of smell alteration in COVID-19 patients**

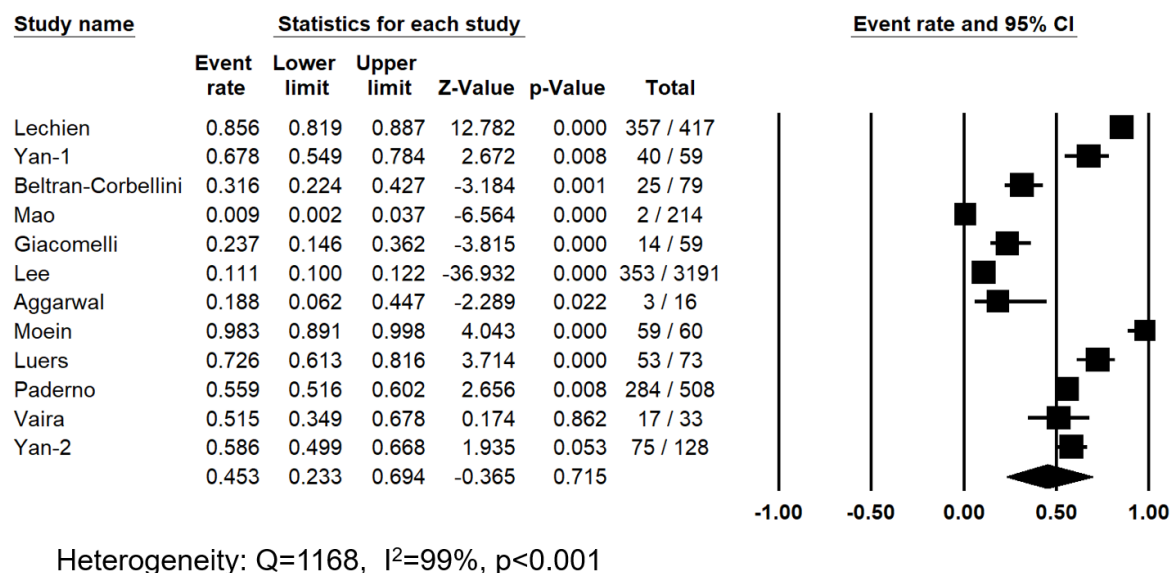

**Figure S3. Forrest plots of the proportion of taste or smell alteration in COVID-19 patients**

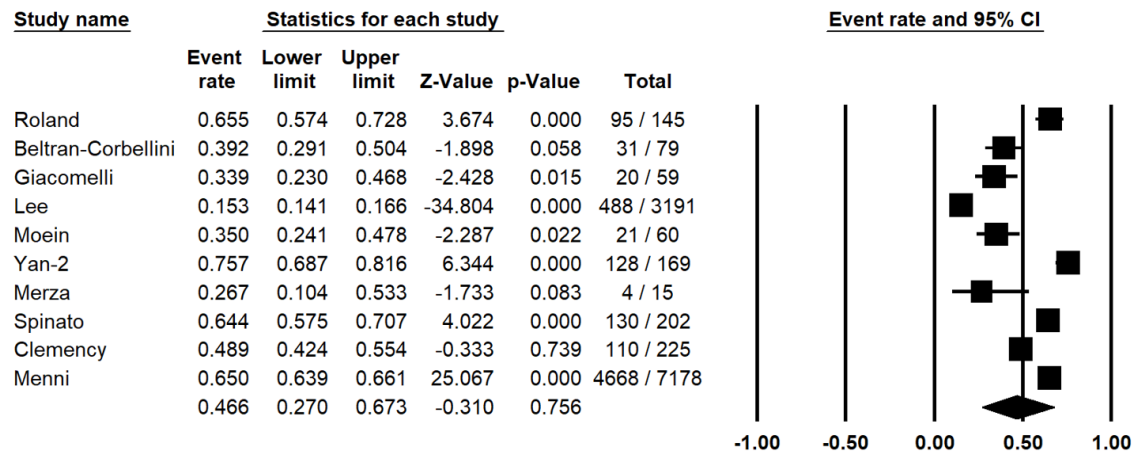

Heterogeneity:  $Q=1870$ ,  $I^2=99.5\%$ ,  $p<0.001$

**Figure S4. Forrest plots of the proportion of taste alteration in COVID-19 patients in East Asia versus non-East Asia**

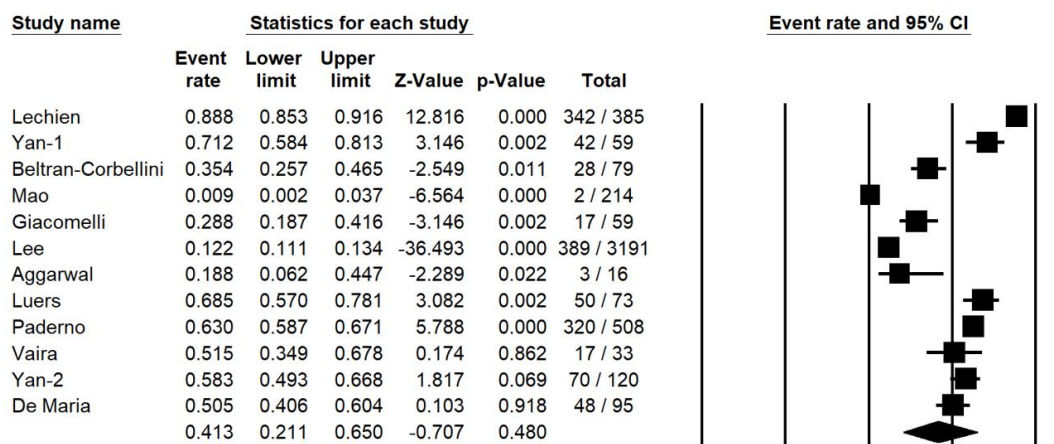

Heterogeneity:  $Q=160.4$ ,  $I^2=94.4\%$ ,  $p<0.001$

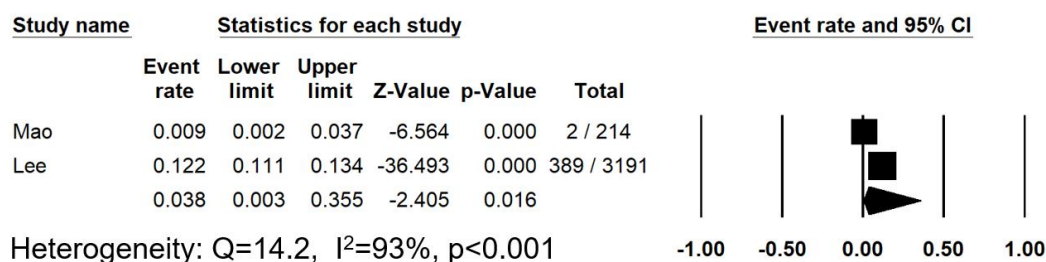

Heterogeneity:  $Q=14.2$ ,  $I^2=93\%$ ,  $p<0.001$

**Figure S5. Forrest plot of the association of taste or smell alteration and COVID-19**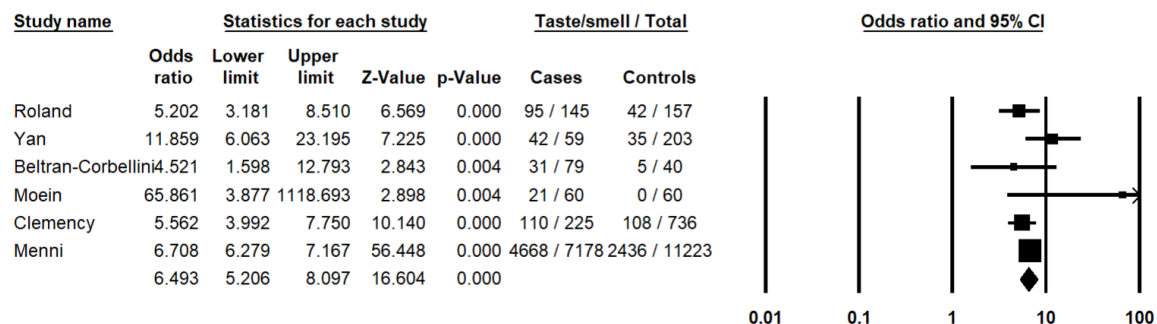

Heterogeneity:  $Q=1160$ ,  $I^2=99.1\%$ ,  $p<0.001$

**Figure S6. Forrest plot of (A) sensitivity, (B) specificity, (C) Positive prediction value, (D) Negative prediction value, and (E) Accuracy of taste or smell alteration in the prediction of COVID-19**

#### (A) Sensitivity

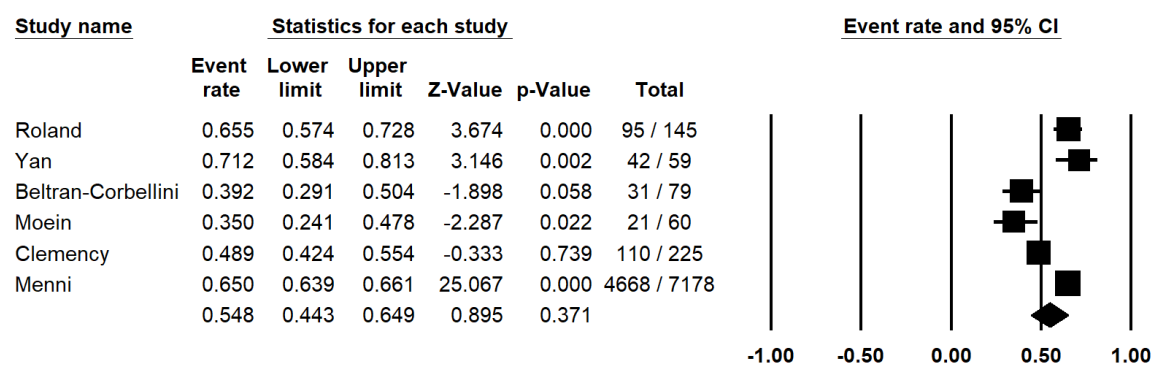

Heterogeneity:  $Q=65.1$ ,  $I^2=92.3\%$ ,  $p<0.001$

**(B) Specificity**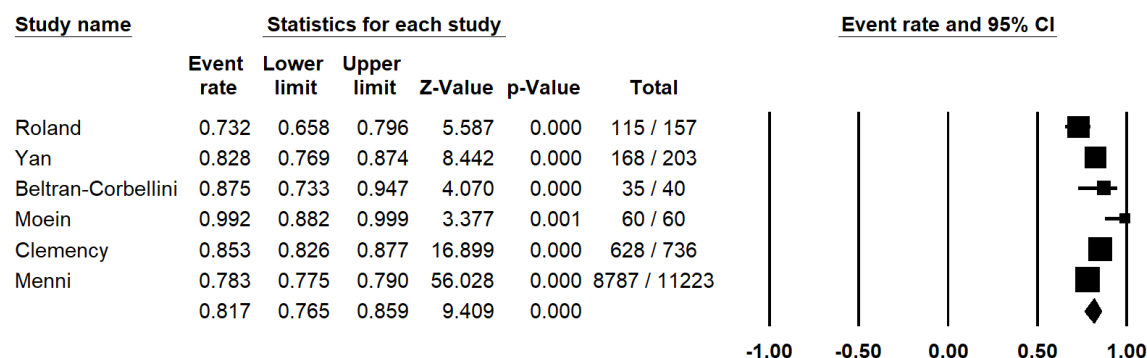

Heterogeneity:  $Q=32.6$ ,  $I^2=84.7\%$ ,  $p<0.001$

**(C) Positive prediction value**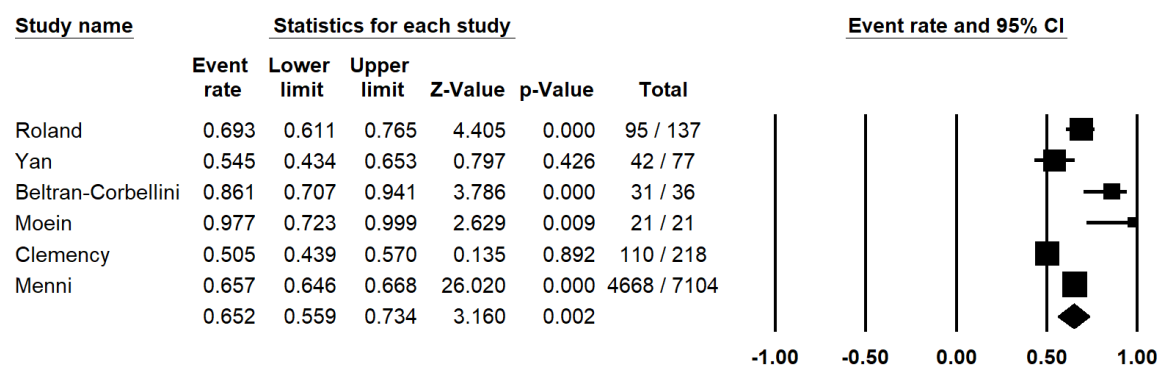

Heterogeneity:  $Q=36.8$ ,  $I^2=86.4\%$ ,  $p<0.001$

**(D) Negative prediction value**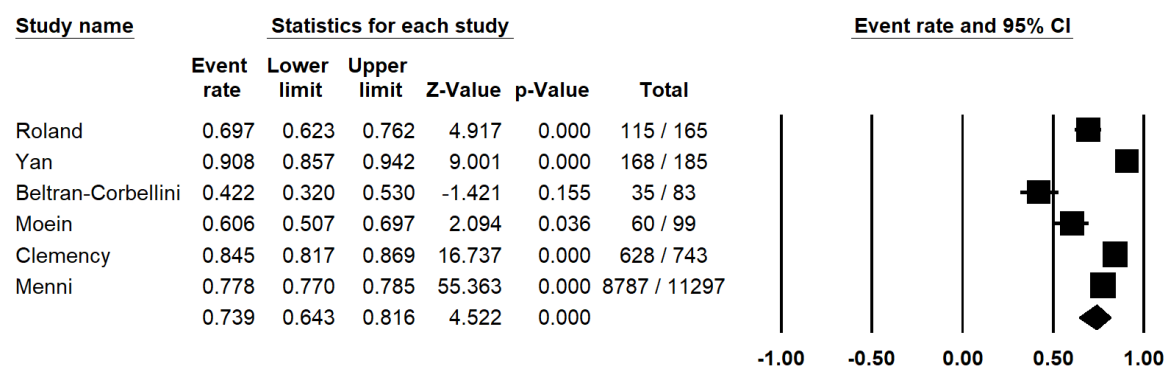

Heterogeneity:  $Q=107.8$ ,  $I^2=95.4\%$ ,  $p<0.001$

### (E) Accuracy

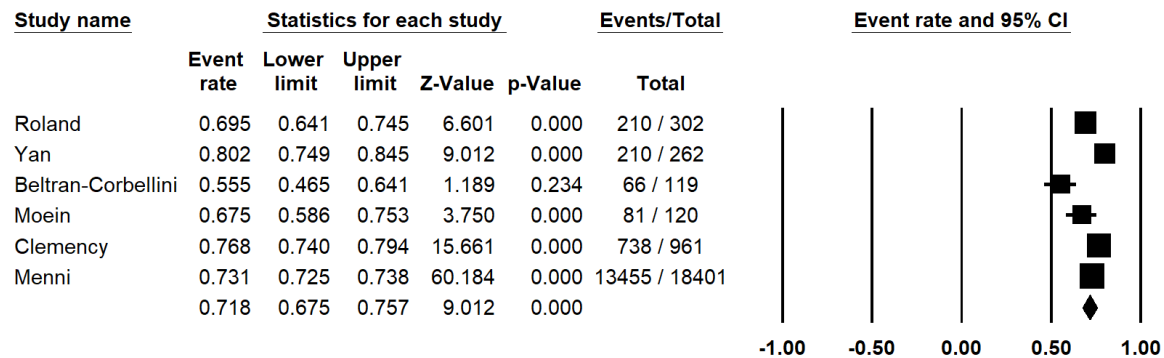

Heterogeneity:  $Q=34.9$ ,  $I^2=85.7\%$ ,  $p<0.0001$

### References

1. Lechien JR, Chiesa-Estomba CM, De Siati DR, et al. Olfactory and gustatory dysfunctions as a clinical presentation of mild-to-moderate forms of the coronavirus disease (COVID-19): a multicenter European study [published online ahead of print, 2020 Apr 6]. *Eur Arch Otorhinolaryngol*. 2020;1-11.
2. Roland LT, Gurrola JG 2nd, Loftus PA, Cheung SW, Chang JL. Smell and taste symptom-based predictive model for COVID-19 diagnosis [published online ahead of print, 2020 May 4]. *Int Forum Allergy Rhinol* 2020;10.1002/alr.22602. doi:10.1002/alr.22602
3. Yan CH, Faraji F, Prajapati DP, Boone CE, DeConde AS. Association of chemosensory dysfunction and Covid-19 in patients presenting with influenza-like symptoms [published online ahead of print, 2020 Apr 12]. *Int Forum Allergy Rhinol* 2020;10.1002/alr.22579. doi:10.1002/alr.22579
4. Beltrán-Corbellini Á, Chico-García JL, Martínez-Poles J, et al. Acute-onset smell and taste disorders in the context of Covid-19: a pilot multicenter PCR-based case-control study [published online ahead of print, 2020 Apr 22]. *Eur J Neurol* 2020;10.1111/ene.14273.

doi:10.1111/ene.14273

5. Mao L, Jin H, Wang M, et al. Neurologic Manifestations of Hospitalized Patients With Coronavirus Disease 2019 in Wuhan, China. *JAMA Neurol* 2020;e201127.
6. Giacomelli A, Pezzati L, Conti F, et al. Self-reported olfactory and taste disorders in SARS-CoV-2 patients: a cross-sectional study. *Clin Infect Dis*. 2020;ciaa330.
7. Lee Y, Min P, Lee S, Kim SW. Prevalence and Duration of Acute Loss of Smell or Taste in COVID-19 Patients. *J Korean Med Sci* 2020;35(18):e174.
8. Aggarwal S, Garcia-Telles N, Aggarwal G, Lavie C, Lippi G, Henry BM. Clinical features, laboratory characteristics, and outcomes of patients hospitalized with coronavirus disease 2019 (COVID-19): Early report from the United States. *Diagnosis (Berl)*. 2020;7:91-6.
9. Moein ST, Hashemian SMR, Mansourafshar B, Khorram-Tousi A, Tabarsi P, Doty RL. Smell dysfunction: a biomarker for COVID-19 [published online ahead of print, 2020 Apr 17]. *Int Forum Allergy Rhinol* 2020;10.1002/alr.22587. doi:10.1002/alr.22587
10. Luers JC, Rokohl AC, Loreck N, et al. Olfactory and Gustatory Dysfunction in Coronavirus Disease 19 (COVID-19) [published online ahead of print, 2020 May 1]. *Clin Infect Dis* 2020;ciaa525. doi:10.1093/cid/ciaa525
11. Paderno A, Schreiber A, Grammatica A, et al. Smell and taste alterations in Covid-19: a cross-sectional analysis of different cohorts. *Int Forum Allergy Rhinol* 2020;10.1002/alr.22610.
12. Vaira LA, Salzano G, Petrocelli M, Deiana G, Salzano FA, De Riu G. Validation of a self-administered olfactory and gustatory test for the remotely evaluation of COVID-19 patients in home quarantine [published online ahead of print, 2020 May 1]. *Head Neck* 2020;10.1002/hed.26228. doi:10.1002/hed.26228
13. Yan CH, Faraji F, Prajapati DP, Ostrander BT, DeConde AS. Self-reported olfactory loss associates with outpatient clinical course in Covid-19 [published online ahead of print, 2020 Apr 24]. *Int Forum Allergy Rhinol* 2020;10.1002/alr.22592. doi:10.1002/alr.22592



14. De Maria A, Varese P, Dentone C, Barisione E, Bassetti M. High prevalence of olfactory and taste disorder during SARS-CoV-2 infection in outpatients [published online ahead of print, 2020 May 8]. *J Med Virol* 2020;10.1002/jmv.25995. doi:10.1002/jmv.25995
15. Merza MA, Haleem Al Mezori AA, Mohammed HM, Abdulah DM. COVID-19 outbreak in Iraqi Kurdistan: The first report characterizing epidemiological, clinical, laboratory, and radiological findings of the disease. *Diabetes Metab Syndr* 2020;14(4):547-54.
16. Spinato G, Fabbris C, Polesel J, et al. Alterations in Smell or Taste in Mildly Symptomatic Outpatients With SARS-CoV-2 Infection. *JAMA* 2020;e206771.
17. Clemency BM, Varughese R, Scheafer DK, et al. Symptom Criteria for COVID-19 Testing of Health Care Workers. *Acad Emerg Med* 2020;10.1111/acem.14009.
18. Menni C, Valdes AM, Freidin MB, et al. Real-time tracking of self-reported symptoms to predict potential COVID-19. *Nat Med* 2020;10.1038/s41591-020-0916-2.
